# Supplementary material
Source: PubMed Central journal article supplement (PMC5783961)
Supplement: zns999170449so4.pdf [file zns999170449so4.pdf]

**Extended data Figure 1-2: Locomotive phenotypes in ParkinKO PD-mito-*Pstl* mice.** Statistical analyses for weight measurements taken at 2, 4, 8, and 12 months of age. p value and Degree of freedom (DF) after one-way ANOVA analysis and Tukey's multiple comparison test

| <b>Age</b>                                          | 2m           | 3m           | 4m           | 5m           | 6m           | 8m           | 12m          |
|-----------------------------------------------------|--------------|--------------|--------------|--------------|--------------|--------------|--------------|
|                                                     | <b>DF 66</b> | <b>DF 60</b> | <b>DF 57</b> | <b>DF 58</b> | <b>DF 41</b> | <b>DF 40</b> | <b>DF 45</b> |
| Cntrl vs. PD-mito- <i>Pstl</i>                      | 0.0002       | 0.0004       | 0.0044       | <0.0001      | <0.0001      | <0.0001      | <0.0001      |
| Cntrl vs. ParkKO                                    | 0.1935       | 0.3949       | 0.3116       | 0.1814       | 0.0006       | 0.0212       | 0.0056       |
| Cntrl vs. ParkKO-PD-mito <i>Pstl</i>                | <0.0001      | <0.0001      | <0.0001      | <0.0001      | <0.0001      | <0.0001      | 0.0004       |
| PD-mito- <i>Pstl</i> vs. ParkKO                     | 0.1658       | 0.0503       | 0.3514       | 0.0210       | 0.5596       | 0.0399       | 0.3334       |
| PD-mito- <i>Pstl</i> vs. ParkKO-PD-mito <i>Pstl</i> | 0.0004       | 0.0009       | 0.0003       | 0.0002       | 0.0307       | 0.9074       | 0.9966       |
| ParkKO vs. ParkKO-PD-mito <i>Pstl</i>               | <0.0001      | <0.0001      | <0.0001      | <0.0001      | 0.0088       | 0.0290       | 0.5703       |
