# Supplementary material
Source: PubMed Central journal article supplement (PMC5783961)
Supplement: zns999170449so5.pdf [file zns999170449so5.pdf]

**Extended data Figure 1-3: Locomotive phenotypes in ParkinKO PD-mito-*Pstf* mice.** Statistical analyses for activity cage measurements taken at 2 months of age. p value and Degree of freedom (DF) after one-way ANOVA analysis and Tukey's multiple comparison test

|          | Cntrl vs. PD-mito- <i>Pstf</i> | Cntrl vs. ParkKO | Cntrl vs. ParkKO-PD-mito <i>Pstf</i> | PD-mito- <i>Pstf</i> vs. ParkKO | PD-mito- <i>Pstf</i> vs. ParkKO-PD-mito <i>Pstf</i> | ParkKO vs. ParkKO-PD-mito <i>Pstf</i> | DF        |
|----------|--------------------------------|------------------|--------------------------------------|---------------------------------|-----------------------------------------------------|---------------------------------------|-----------|
| 7:00 PM  | 0.9815                         | 0.5514           | 0.0196                               | 0.2361                          | 0.0031                                              | 0.1609                                | <b>23</b> |
| 7:30 PM  | 0.2327                         | 0.7948           | 0.0134                               | 0.0161                          | <0.0001                                             | 0.0468                                | <b>25</b> |
| 8:00 PM  | 0.8577                         | 0.6097           | 0.0056                               | 0.2037                          | 0.0009                                              | 0.0784                                | <b>26</b> |
| 8:30 PM  | 0.7269                         | 0.828            | 0.0031                               | 0.2544                          | 0.0003                                              | 0.0215                                | <b>26</b> |
| 9:00 PM  | 0.8709                         | 0.7464           | 0.0738                               | 0.3104                          | 0.0152                                              | 0.3817                                | <b>26</b> |
| 9:30 PM  | 0.5438                         | >0.9999          | 0.0032                               | 0.5134                          | 0.0001                                              | 0.0036                                | <b>26</b> |
| 10:00 PM | 0.9985                         | 0.2423           | 0.0151                               | 0.3114                          | 0.0213                                              | 0.4597                                | <b>26</b> |
| 10:30 PM | 0.9971                         | 0.9856           | 0.1453                               | 0.9989                          | 0.2023                                              | 0.2536                                | <b>26</b> |
| 11:00 PM | 0.1047                         | 0.4947           | 0.8536                               | 0.7729                          | 0.0276                                              | 0.1729                                | <b>26</b> |
| 11:30 PM | >0.9999                        | 0.7483           | 0.0652                               | 0.729                           | 0.061                                               | 0.3492                                | <b>26</b> |
| 12:00 AM | 0.8865                         | 0.9854           | 0.9796                               | 0.9812                          | 0.7166                                              | 0.8924                                | <b>26</b> |
| 12:30 AM | 0.9998                         | 0.9718           | 0.9812                               | 0.9634                          | 0.9792                                              | >0.9999                               | <b>21</b> |
| 1:00 AM  | 0.7616                         | 0.8285           | 0.5542                               | 0.9992                          | 0.9746                                              | 0.949                                 | <b>26</b> |
| 1:30 AM  | 0.9351                         | 0.9213           | 0.9643                               | >0.9999                         | 0.9999                                              | 0.9995                                | <b>26</b> |
| 2:00 AM  | 0.969                          | 0.6932           | 0.9971                               | 0.915                           | 0.9963                                              | 0.8454                                | <b>26</b> |
| 2:30 AM  | 0.6944                         | 0.7176           | 0.481                                | >0.9999                         | 0.972                                               | 0.9649                                | <b>26</b> |
| 3:00 AM  | 0.357                          | 0.7478           | 0.2101                               | 0.9077                          | 0.967                                               | 0.7046                                | <b>26</b> |
| 3:30 AM  | 0.4732                         | 0.1678           | 0.4553                               | 0.9057                          | 0.999                                               | 0.9617                                | <b>26</b> |
| 4:00 AM  | >0.9999                        | 0.5523           | 0.627                                | 0.5523                          | 0.627                                               | >0.9999                               | <b>26</b> |
| 4:30 AM  | 0.3455                         | 0.4747           | 0.7459                               | 0.9952                          | 0.9422                                              | 0.9857                                | <b>26</b> |
| 5:00 AM  | 0.9883                         | 0.998            | 0.9079                               | 0.9989                          | 0.9822                                              | 0.957                                 | <b>26</b> |
| 5:30 AM  | 0.935                          | >0.9999          | 0.9103                               | 0.9234                          | 0.9994                                              | 0.8977                                | <b>26</b> |
| 6:00 AM  | 0.3625                         | 0.7563           | 0.3109                               | 0.9062                          | 0.9957                                              | 0.8294                                | <b>26</b> |
| 6:30 AM  | 0.2071                         | 0.9929           | 0.1004                               | 0.3203                          | 0.9486                                              | 0.1619                                | <b>26</b> |
| 7:00 AM  | 0.832                          | >0.9999          | 0.284                                | 0.8484                          | 0.7259                                              | 0.2984                                | <b>26</b> |
