# Supplementary material
Source: PubMed Central journal article supplement (PMC5783961)
Supplement: zns999170449so6.pdf [file zns999170449so6.pdf]

**Extended data Figure 1-4: Locomotive phenotypes in ParkinKO PD-mito-Pstl mice.** Statistical analyses for motor tests measurements taken at 2 months of age. p value and Degree of freedom (DF) after one-way ANOVA analysis and Tukey's multiple comparison test

| <b>Test</b>                         | Rota-rod     | Pole test    | Distance travelled | Vertical time |
|-------------------------------------|--------------|--------------|--------------------|---------------|
|                                     | <b>DF 27</b> | <b>DF 68</b> | <b>DF 28</b>       | <b>DF 28</b>  |
| Cntrl vs. PD-mito-Pstl              | 0.5131       | 0.0418       | 0.3871             | 0.0048        |
| Cntrl vs. ParkKO                    | 0.9733       | 0.9997       | 0.3752             | 0.0065        |
| Cntrl vs. ParkKO-PD-mitoPstl        | 0.1363       | 0.9993       | 0.4852             | 0.0002        |
| PD-mito-Pstl vs. ParkKO             | 0.2399       | 0.053        | >0.9999            | 0.9885        |
| PD-mito-Pstl vs. ParkKO-PD-mitoPstl | 0.7915       | 0.0515       | 0.9993             | 0.4993        |
| ParkKO vs. ParkKO-PD-mitoPstl       | 0.0425       | >0.9999      | 0.9999             | 0.2963        |
