# Supplementary material
Source: PubMed Central journal article supplement (PMC5783961)
Supplement: zns999170449so7.pdf [file zns999170449so7.pdf]

**Extended data Figure 1-5: Locomotive phenotypes in ParkinKO PD-mito-*Pstl* mice.** Statistical analyses for motor tests measurements taken at 12 months of age. p value and Degree of freedom (DF) after one-way ANOVA analysis and Tukey's multiple comparison test

| <b>Test, Age</b>                    | Pole test, 4mo | Vertical counts, 12m | Distance travelled, 12m | Rota-rod, 12m |
|-------------------------------------|----------------|----------------------|-------------------------|---------------|
|                                     | <b>DF 51</b>   | <b>DF 23</b>         | <b>DF 23</b>            | <b>DF 20</b>  |
| Cntrl vs. PD-mito-Pstl              | <0.0001        | 0.9983               | 0.8756                  | 0.6843        |
| Cntrl vs. ParkKO                    | 0.9765         | 0.7387               | 0.5829                  | 0.9793        |
| Cntrl vs. ParkKO-PD-mitoPstl        | 0.5137         | 0.6741               | 0.9493                  | 0.9555        |
| PD-mito-Pstl vs. ParkKO             | <0.0001        | 0.7251               | 0.1337                  | 0.2698        |
| PD-mito-Pstl vs. ParkKO-PD-mitoPstl | <0.0001        | 0.6472               | 0.5196                  | 0.9124        |
| ParkKO vs. ParkKO-PD-mitoPstl       | 0.5871         | 0.9995               | 0.8773                  | 0.7284        |
