# Supplementary material
Source: PubMed Central journal article supplement (PMC5783961)
Supplement: zns999170449so8.pdf [file zns999170449so8.pdf]

**Extended data Figure 3-2: Striatal alterations of dopamine and its metabolites.** Statistical analyses for dopamine and dopamine metabolites at 4, 8 and 12 months of age. p value and Degree of freedom (DF) after one-way ANOVA analysis and Tukey's multiple comparison test

| <b>Metabolite Age</b>               | DA 4mo       | DA 8mo       | DA 12mo      | 3MT 4mo      | 3MT 8mo      | 3MT 12mo     | HVA 4mo      | HVA 8mo     | HVA 12mo     | DOPAC 4mo    | DOPAC 8mo    | DOPAC 12mo   |
|-------------------------------------|--------------|--------------|--------------|--------------|--------------|--------------|--------------|-------------|--------------|--------------|--------------|--------------|
|                                     | <b>DF 11</b> | <b>DF 14</b> | <b>DF 14</b> | <b>DF 11</b> | <b>DF 10</b> | <b>DF 17</b> | <b>DF 10</b> | <b>DF 9</b> | <b>DF 16</b> | <b>DF 10</b> | <b>DF 15</b> | <b>DF 17</b> |
| Cntrl vs. PD-mito-Pstl              | 0.001        | 0.0045       | 0.0002       | 0.8703       | 0.0009       | 0.4949       | 0.0362       | 0.1357      | 0.0052       | <0.0001      | 0.0762       | 0.6801       |
| Cntrl vs. ParkKO                    | 0.8996       | >0.9999      | 0.246        | 0.0063       | 0.3945       | 0.0124       | 0.0981       | 0.9461      | <0.0001      | 0.995        | 0.9951       | >0.9999      |
| Cntrl vs. ParkKO-PD-mitoPstl        | 0.0022       | 0.0052       | 0.0005       | <0.0001      | 0.001        | <0.0001      | 0.0001       | 0.006       | <0.0001      | 0.0506       | 0.3909       | 0.0144       |
| PD-mito-Pstl vs. ParkKO             | 0.001        | 0.0042       | <0.0001      | 0.0016       | 0.006        | 0.1779       | 0.8267       | 0.304       | 0.0337       | <0.0001      | 0.0464       | 0.8128       |
| PD-mito-Pstl vs. ParkKO-PD-mitoPstl | 0.7957       | 0.8747       | 0.9731       | <0.0001      | 0.9904       | 0.0003       | 0.0145       | 0.1374      | <0.0001      | 0.0031       | 0.8476       | 0.1045       |
| ParkKO vs. ParkKO-PD-mitoPstl       | 0.0025       | 0.0049       | <0.0001      | 0.0116       | 0.0063       | 0.0255       | 0.0023       | 0.0129      | 0.0006       | 0.0164       | 0.2816       | 0.0353       |
