# Supplementary material
Source: PubMed Central journal article supplement (PMC5783961)
Supplement: zns999170449so9.pdf [file zns999170449so9.pdf]

**Extended data Figure 4-2: MtDNA deletions and mutations increase when endogenous Parkin is lost in PD-mito-Pstl mice striata.** Statistical analyses for qPCR performed on DNA after LCM and on DNA from striatum at 4 months. p value and Degree of freedom (DF) after one-way ANOVA analysis and Tukey's multiple comparison test

| <b>Brain region, Age qPCR</b>       | LCM, 4m COXI | Str, 4m COXI | Str, 4m ND4  | Str, 4m PstDel    | Str, 4m L.R. PCR |
|-------------------------------------|--------------|--------------|--------------|-------------------|------------------|
|                                     | <b>DF 18</b> | <b>DF 25</b> | <b>DF 24</b> | <b>DF 11</b>      | <b>DF 15</b>     |
| Cntrl vs. PD-mito-Pstl              | 0.9899       | 0.4086       | 0.3704       | -                 | 0.0334           |
| Cntrl vs. ParkKO                    | 0.0103       | 0.0184       | 0.8286       | -                 | 0.4578           |
| Cntrl vs. ParkKO-PD-mitoPstl        | 0.1449       | 0.7032       | 0.8045       | -                 | 0.0076           |
| PD-mito-Pstl vs. ParkKO             | 0.0853       | <0.0001      | 0.0371       | -                 | 0.3704           |
| PD-mito-Pstl vs. ParkKO-PD-mitoPstl | 0.0055       | 0.0303       | 0.0475       | (Ttest)<br>0.0398 | 0.9481           |
| ParkKO vs. ParkKO-PD-mitoPstl       | 0.5926       | 0.1034       | 0.9995       | -                 | 0.1312           |
